# Supplementary material for: Temperature-sensitive polypeptide nanogels for intracellular delivery of a biomacromolecular drug
Source: Royal Society of Chemistry journal article supplement (doi:10.1039/c5tb00366k), 2015-01-01

## Supporting Information

### **Temperature-sensitive polypeptide nanogel for intracellular delivery of biomacromolecular drug**

Du Young Ko, Hyo Jung Moon, and Byeongmoon Jeong\*

Department of Chemistry and Nano Science, Ewha Womans University,  
52 Ewhayeodae-gil, Seodaemun-gu, Seoul, 120-750, Korea

\* E-mail: [bjjeong@ewha.ac.kr](mailto:bjjeong@ewha.ac.kr)

Fig. S1 Gel permeation chromatogram (a) and FTIR spectra (b) of PEG-PK-PA.

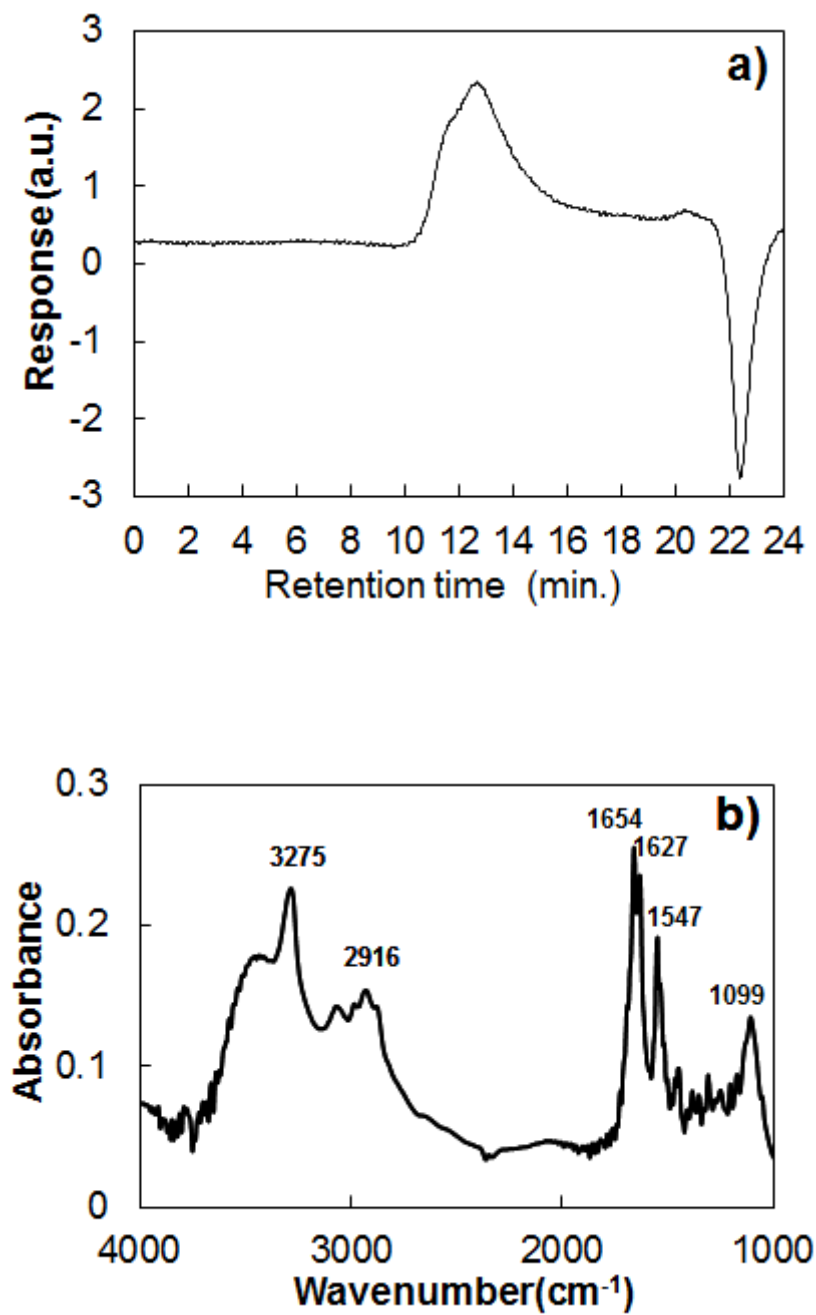

**Fig. S2** Transmission electron microscopy image of PEG-PK-PA /HA nanogels with zero zeta potential. The scale bar is 200 nm.

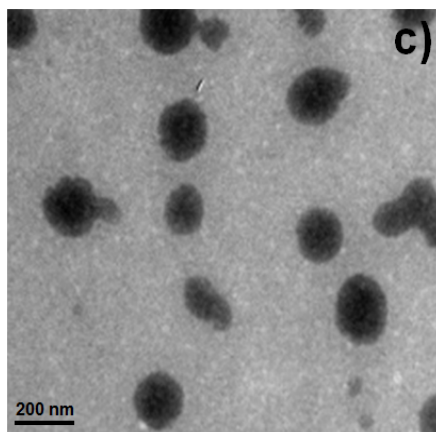

**Fig. S3** Internalization of the FITC loaded nanogels into the cell after the treatment of inhibitors such as chlorpromazine, filipin, and rottlerin. Positive control indicates the FITC loaded PEG-PK-PA /HA nanogels with zero zeta potential in the absence of inhibitors.

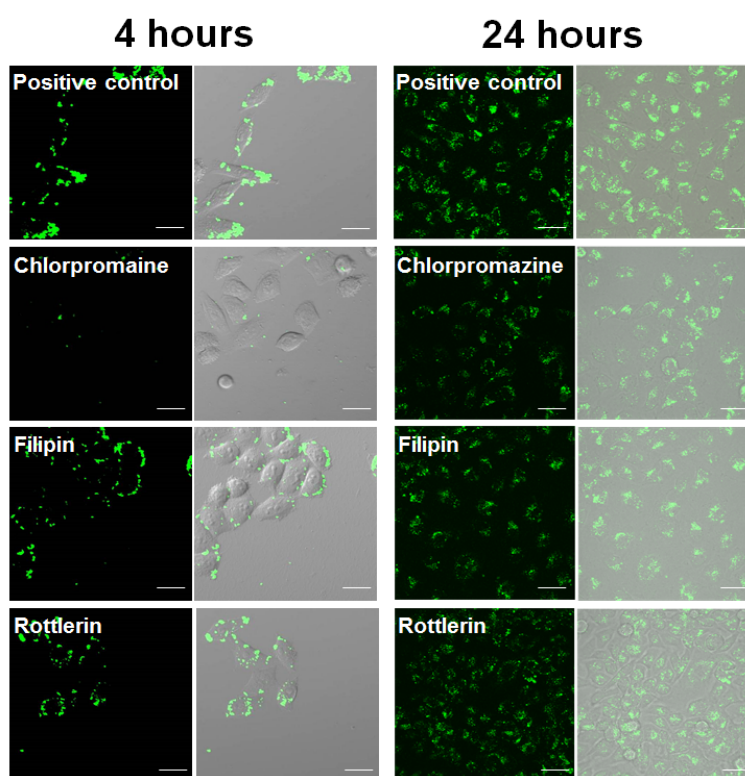

Supplement: c5tb00366k1.pdf [file c5tb00366k1.pdf]
